# Supplementary material for: The Initial Field Trials of DSM-5: New Blooms and Old Thorns
Source: Atypon-hosted journal article supplement (doi:10.1176/appi.ajp.2012.12091189), 2013-01-01
Supplement: 1_ds001.pdf [file 1_ds001.pdf]

## Los ensayos de campo iniciales del DSM-5: nuevas flores y viejas espinas

“Una rosa es una rosa es una rosa” (1). Para el diagnóstico psiquiátrico, todavía interpretamos este verso como hicieron Robins y Guze en sus Criterios Diagnósticos en Investigación (*Research Diagnostic Criteria*): la fiabilidad es la primera prueba de la validez del diagnóstico (2). Para desarrollar una psiquiatría basada en datos científicos, en el DSM-III y el DSM-IV se adoptó la estrategia de Robins y Guze (es decir, criterios validados empíricamente para los signos y síntomas reconocibles de enfermedad). Los resultados iniciales de fiabilidad de los ensayos de campo del DSM-5 se publican ahora en tres artículos de este número (3–5). Al igual que en todas las ediciones previas del DSM, los métodos utilizados a fin de evaluar la fiabilidad reflejan los estándares actuales de la investigación psiquiátrica (3). En los ensayos de campo del DSM se emplean ahora por primera vez entrevistas independientes realizadas por dos médicos diferentes expertos en los diagnósticos, cada uno ayudado por una lista de verificación computarizada, una evaluación de la coincidencia entre diferentes centros académicos y un plan estadístico preestablecido. Al igual que en la mayor parte de los nuevos intentos, los resultados finales son desiguales, con datos tanto positivos como decepcionantes.

Es posible que el estadístico kappa utilizado para el análisis no resulte familiar para la mayoría de los médicos. A título de ejemplo, si una enfermedad aparece en el 10% de los pacientes de un médico y dos colegas están de acuerdo con su diagnóstico en el 85% de las ocasiones, el estadístico kappa es de 0.46,

similar al estadístico compuesto ponderado para la esquizofrenia en este ensayo de campo del DSM-5 (Figura 1). Los criterios de la esquizofrenia se modificaron radicalmente en el DSM-III y se volvieron a modificar en el DSM-IV debido a las discrepancias mundiales en su diagnóstico. En la actualidad, el problema para diferenciar esquizofrenia, trastorno bipolar y trastorno esquizoafectivo—el *quid* de las discrepancias—se ha resuelto en gran medida y los tres trastornos tienen un buen estadístico kappa.

La discutible fiabilidad del trastorno depresivo mayor, que no se ha modificado con respecto al DSM-IV, constituye obviamente un problema. El trastorno depresivo mayor ha sido siempre problemático porque sus criterios engloban una amplia gama de enfermedades: desde los pacientes melancólicos muy discapacitados hasta muchas personas de la población general que no requieren tratamiento. Mientras que la intensidad de los síntomas en la Escala de valoración de la depresión de Hamilton (*Hamilton Depression Rating Scale*) permite distinguir a aquellos pacientes que responden más específicamente a la farmacoterapia, los criterios del DSM-IV no reflejan esa distinción (6). Un segundo problema no resuelto por los criterios del DSM-IV es la habitual concurrencia de la ansiedad, que disminuye marcadamente los efectos del tratamiento antidepresivo (7). El grupo de trabajo del

---

*Una sola entrevista diagnóstica, con independencia de su fiabilidad, no captura la esencia de lo que está ocurriendo... El diagnóstico exacto debe ser parte de un diálogo clínico continuo con el paciente*

---

FIGURA 1. Fiabilidad de los diagnósticos entre evaluadores de los ensayos de campo iniciales del DSM-5<sup>a</sup>

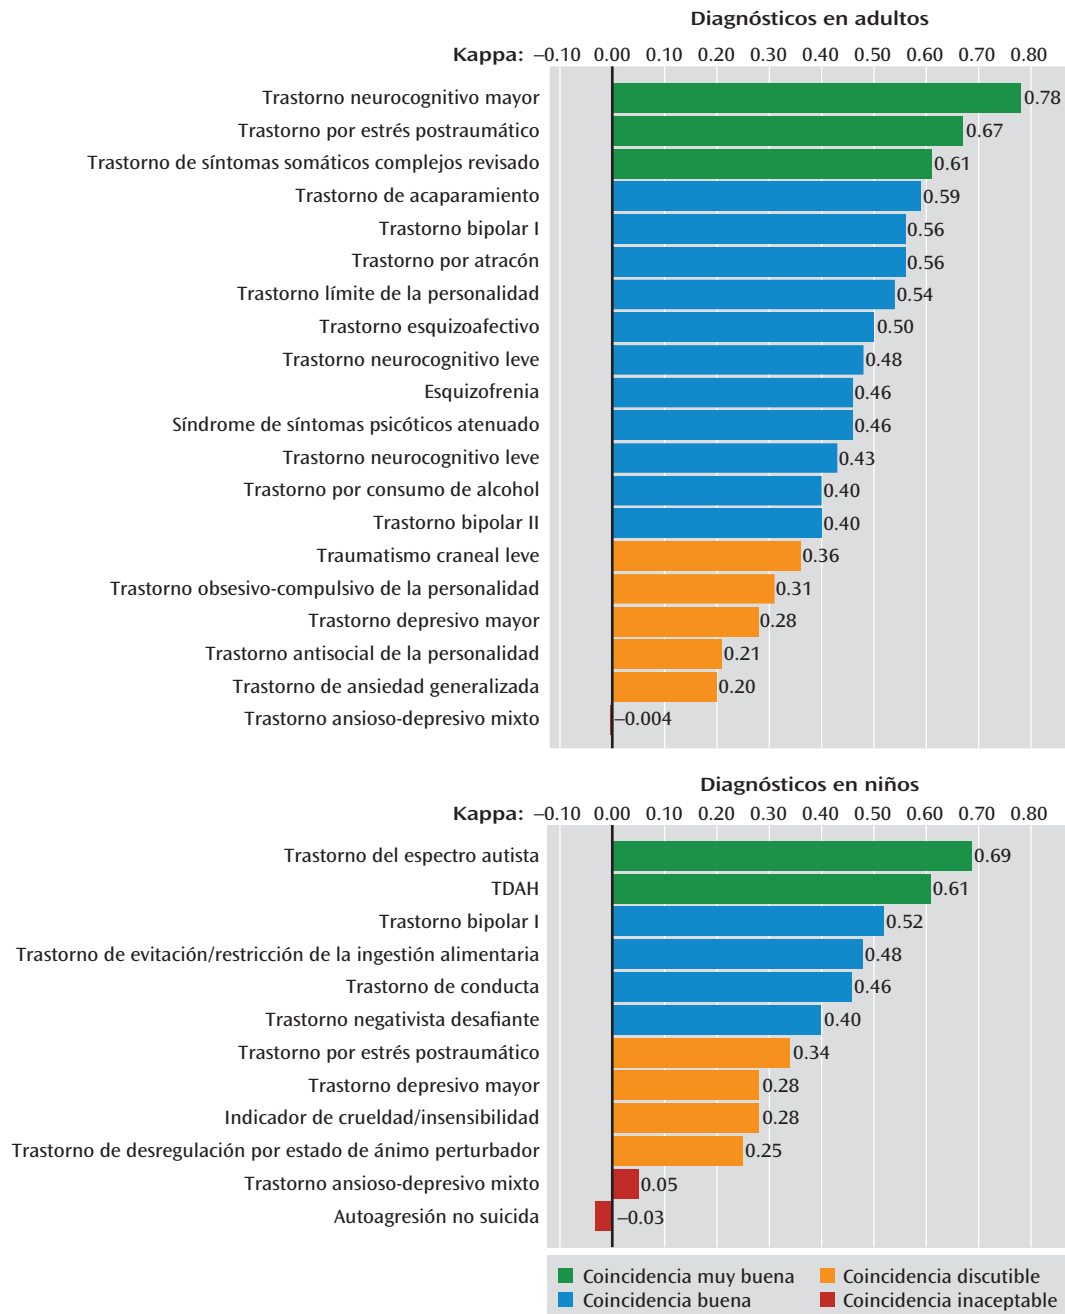

<sup>a</sup> Algunos de los estadísticos kappa no superaron el criterio de un error estándar inferior a 0.1. Se incluyen aquí con fines ilustrativos. Para más detalles véanse los informes de los ensayos sobre el terreno (3–5).

DSM-5 decidió no modificar los criterios del trastorno depresivo mayor del DSM-IV y, en su lugar, creó otros diagnósticos para la combinación de ansiedad y depresión. Sin embargo, estos esfuerzos no mejoraron la escasa fiabilidad de la depresión del DSM-IV; “ansiedad y depresión mixtas” tiene un valor kappa de 0. Los médicos a menudo utilizan como un indicador de gravedad la autoevaluación de los pacientes mediante el Inventario de la depresión de Beck (*Beck Depression Inventory*). Los dominios transversales dimensionales en este ensayo de campo se basan asimismo en la autoevaluación (5). Para la depresión existen dos dominios y las correlaciones intraclase—que son similares al estadístico kappa—en los pacientes adultos que

se autoevalúan y repiten la autoevaluación y en los progenitores que evalúan a sus hijos; superan todas ellas el 0.6. En futuras revisiones probablemente será necesario integrar los numerosos factores—autoevaluaciones de los pacientes, sesgos cognitivos, ansiedad concurrente y síntomas vegetativos—que orientan la elección del tratamiento, el pronóstico y la evaluación del riesgo de suicidio.

Los médicos experimentados tienen importantes reservas acerca del esquema diagnóstico de investigación propuesto para el trastorno de la personalidad, cuya aplicabilidad a la práctica clínica todavía está por determinarse (8). La mayor parte de los diagnósticos de trastorno de la personalidad no funcionaron bien en el ensayo de campo. Los trastornos antisocial y obsesivo-compulsivo de la personalidad tuvieron una fiabilidad discutible o no concluyente y otros tipos, como los trastornos narcisista y esquizotípico de la personalidad, no fueron lo bastante frecuentes como para poder evaluarlos. El éxito del trastorno límite de la personalidad constituye, no obstante, un gran avance. En el DSM-III se relegaron la mayor parte de los trastornos de la personalidad al eje II, lo que cortó radicalmente una de las raíces más venerables de la psiquiatría. Pero los médicos reconocieron que la patología del carácter, a pesar de su aparente estabilidad, era a la vez bastante discapacitante y dócil al tratamiento. El trastorno límite de la personalidad surge ahora como un diagnóstico principal por derecho propio, con buena fiabilidad diagnóstica.

El estado de ánimo inestable, una característica primordial del trastorno límite de la personalidad en la edad adulta, es también la característica destacada en la infancia de un nuevo trastorno que se ha denominado *disruptive mood dysregulation disorder* (trastorno de desregulación por estado de ánimo perturbador). Este trastorno tiene un estadístico kappa más pequeño. El trastorno de desregulación por estado de ánimo perturbador se evaluó con más fiabilidad en el ámbito hospitalario, donde se examinó, al igual que el trastorno límite de la personalidad, en sus inicios. Es posible que a medida que aumente la experiencia clínica con este nuevo diagnóstico infantil mejore su rendimiento diagnóstico. La fiabilidad de los diagnósticos de TDAH y de trastorno bipolar en la infancia, que han sido problemáticos sobre todo en presencia de irritabilidad, probablemente se haya beneficiado con la alternativa del trastorno de desregulación por estado de ánimo perturbador; ambos tienen un buen estadístico kappa. El trastorno del espectro autista, recientemente reorganizado y que ha sido también objeto de un gran debate previo, tiene un valor kappa muy bueno, aunque en los ensayos no se incluyó a niños menores de seis años.

El trastorno por estrés postraumático (TEPT) es otro logro histórico, con un valor kappa de 0.67. La serie del DSM se inició porque “era necesario aplicar la ‘etiqueta de psiconeurótico’ a las personas que reaccionan brevemente con síntomas neuróticos ante un estrés considerable; personas que... no eran habitualmente psiconeuróticas” (9). Cuatro ediciones y 60 años más tarde, el TEPT es actualmente un diagnóstico fiable de un trastorno que se podría haber desestimado como comportamiento normal patologizador. Se han introducido otros diagnósticos nuevos o se han redefinido con buena fiabilidad: trastorno neurocognitivo mayor, trastorno de acaparamiento, trastorno de síntomas somáticos complejos y trastorno por atracción, además de los ya comentados.

En los ensayos de campo era necesario llegar a un diagnóstico a partir de una sola entrevista con el paciente y una información colateral mínima. En la práctica psiquiátrica general, los datos de fiabilidad diagnóstica—combinación de la Tabla 1 (muestras ponderadas en un entorno ambulatorio de pacientes adultos, incluyendo el TDAH infantil en la categoría de “otros diagnósticos”) y de las Tablas 2 y 4 (fi-

abilidad de los diagnósticos en adultos y niños [4])—indican que dos tercios de los pacientes tendrán un diagnóstico principal fiable basado en el DSM-5 en la primera visita. Estos diagnósticos habituales fiables son TDAH infantil, TEPT, trastorno límite de la personalidad y trastorno por consumo de alcohol. En el tercio de los pacientes con un traumatismo craneal leve o un trastorno depresivo mayor es posible que no se llegue a un diagnóstico fiable con una sola entrevista. Desde luego, este cálculo será diferente en cada ámbito clínico. Robins y Guze introdujeron una categoría “no diagnosticada” para insistir en que los pacientes fueran examinados de nuevo, más adelante, cuando sus síntomas iniciales no dieran lugar a un diagnóstico inequívoco. En los ensayos de campo del DSM-5 no se examinó el aumento de fiabilidad derivado de que el mismo médico encargado del tratamiento evaluara al paciente a lo largo del tiempo a medida que desarrollara la enfermedad.

“Una rosa es una rosa es una rosa es una rosa” tiene un significado más profundo para Gertrude Stein, en relación no sólo con la clasificación de la flor, sino también con su esencia imperecedera (10). El conocimiento de la evolución natural de una enfermedad, de su respuesta al tratamiento y de su repercusión en la vida de la persona son las razones que aducimos para hacer diagnósticos fiables, pero una sola entrevista diagnóstica, con independencia de lo fiable que sea, no capta la esencia de lo que le está ocurriendo al paciente. De las posibles lecciones para los médicos y para los pacientes y sus familiares que lean estos ensayos de campo, quizá la más importante sea que el diagnóstico exacto debe ser parte del diálogo clínico continuo con el paciente.

La mejoría del diagnóstico también es constante. Las pruebas futuras deben tener en cuenta la utilidad clínica en situaciones terapéuticas reales y la fiabilidad y viabilidad de aplicar los nuevos criterios fuera de centros médicos académicos. Los médicos que trabajan solos y los consultorios de salud mental quizá no posean recursos para el nivel de formación que requieren los ensayos de campo. Uno de los requisitos era que los pacientes hablaran y leyeran inglés, aunque algunos eran bilingües. La fiabilidad quizá no sea la misma en los pacientes con un nivel de estudios más bajo o que no tengan un dominio completo del inglés. Los datos de estos ensayos de campo se utilizarán a fin de introducir nuevas mejoras, por lo que los criterios finales pueden cambiar y requerir nuevas valoraciones después de la publicación del DSM-5. Al igual que sus predecesores, el DSM-5 no consigue todo lo que pretendía, aunque sí marca un progreso continuo para muchos pacientes en los que no se habían cumplido previamente los efectos benéficos de los diagnósticos y del tratamiento.

### Bibliografía

1. Goodwin DW: Preface, in *Psychiatric Diagnosis*. By Woodruff RA, Goodwin DW, Guze SB. New York, Oxford University Press, 1974
2. Robins E, Guze SB: Establishment of diagnostic validity in psychiatric illness: its application to schizophrenia. *Am J Psychiatry* 1970; 126:983–987
3. Clarke DE, Narrow WE, Regier DA, Kuramoto SJ, Kupfer DJ, Kuhl EA, Greiner L, Kraemer HC: DSM-5 Field Trials in the United States and Canada, part I: study design, sampling strategy, implementation, and analytic approaches. *Am J Psychiatry* 2013; 170:43–58
4. Regier DA, Narrow WE, Clarke DE, Kraemer HC, Kuramoto SJ, Kuhl EA, Kupfer DJ: DSM-5 Field Trials in the United States and Canada, part II: test-retest reliability of selected categorical diagnoses. *Am J Psychiatry* 2013; 170:59–70
5. Narrow WE, Clarke DE, Kuramoto SJ, Kraemer HC, Kupfer DJ, Greiner L, Regier DA: DSM-5 Field Trials in the United States and Canada, part III: development and reliability testing of a cross-cutting symptom assessment for DSM-5. *Am J Psychiatry* 2013; 170:71–82
6. Fournier JC, DeRubeis RJ, Hollon SD, Dimidjian S, Amsterdam JD, Shelton RC, Fawcett J: Antidepressant drug effects and depression severity: a patient-level meta-analysis. *JAMA* 2010; 303:47–53

7. Fava M, Rush AJ, Alpert JE, Balasubramani GK, Wisniewski SR, Carmin CN, Biggs MM, Zisook S, Leuchter A, Howland R, Warden D, Trivedi MH: Difference in treatment outcome in outpatients with anxious versus nonanxious depression: a STAR\*D report. *Am J Psychiatry* 2008; 165:342–351
8. Shedler J, Beck A, Fonagy P, Gabbard GO, Gunderson J, Kernberg O, Michels R, Westen D: Personality disorders in DSM-5. *Am J Psychiatry* 2010; 167:1026–1028
9. American Psychiatric Association: *Diagnostic and Statistical Manual of Mental Disorders*. Washington, DC, American Psychiatric Association, 1952
10. Stein G: "Sacred Emily," in *Geography and Plays*. Madison, University of Wisconsin Press, 1922 (reissued 1993)

**ROBERT FREEDMAN, M.D.**  
**DAVID A. LEWIS, M.D.**  
**ROBERT MICHELS, M.D.**  
**DANIEL S. PINE, M.D.**  
**SUSAN K. SCHULTZ, M.D.**  
**CAROL A. TAMMINGA, M.D.**  
**GLEN O. GABBARD, M.D.**  
**SUSAN SHUR-FEN GAU, M.D., PH.D.**  
**DANIEL C. JAVITT, M.D., PH.D.**  
**MARIA A. OQUENDO, M.D., PH.D.**  
**PATRICK E. SHROUT, PH.D.**  
**EDUARD VIETA, M.D., PH.D.**  
**JOEL YAGER, M.D.**

*De la Oficina de Redacción de The American Journal of Psychiatry. Diríjase la correspondencia al Dr. Freedman (ajp@psych.org). Editorial aceptado para su publicación en septiembre de 2012 (doi: 10.1176/appi.ajp.2012.12091189).*

*Los autores son redactores o fueron invitados por estos para colaborar en este editorial. Algunos desempeñan otros cometidos en el proceso del DSM-5. El Dr. Freedman es copresidente del Comité de Revisión Científica, el Dr. Pine es presidente del grupo de trabajo de Trastornos Infantiles, la Dra. Schultz es miembro del grupo de trabajo de Trastornos Geriátricos y redactora del texto y el Dr. Yager es copresidente del Comité de Revisión Clínica y de Salud Pública. Tanto el Dr. Yager como el Dr. Freedman son también miembros del Grupo de Trabajo en la Cumbre, que hace recomendaciones finales al Consejo de Administración de la American Psychiatric Association. El Dr. Gabbard es director jefe de la 5ª edición de Treatments of Psychiatric Disorders (Tratamientos de los trastornos psiquiátricos), que será publicado por la American Psychiatric Publishing como el libro de tratamiento inicial del DSM-5. Las declaraciones de intereses económicos del redactor y de los redactores adjuntos se publican todos los años en el número de enero. La Dra. Gau ha recibido honorarios como ponente y fondos para viáticos de Eli Lilly; ha sido investigadora en un ensayo clínico patrocinado por Eli Lilly y ha recibido honorarios como ponente de AstraZeneca y Janssen. El Dr. Javitt ha recibido becas para la investigación de Jazz Pharmaceuticals, Pfizer y Roche; ha actuado como asesor de AstraZeneca, Bristol-Myers Squibb, Cypress, Lilly, Lundbeck, Merck, NPS, Pfizer, Sanofi, Schering-Plough, Sepracor, Solvay, Takeda y Sunovion; participa en el comité asesor de Promentis Pharmaceuticals y posee acciones de Glytech, Inc. La Dra. Oquendo ha recibido becas ilimitadas para la educación u honorarios como ponente de AstraZeneca, Bristol-Myers Squibb, Eli Lilly, Janssen, Otsuka, Pfizer, Sanofi-Aventis y Shire; posee acciones de Bristol-Myers Squibb y recibe pagos por derechos de autor por eC-SSRS de ERT, Inc. El Dr. Vieta se ha desempeñado como asesor y ponente y recibido apoyo para la investigación de AstraZeneca, Bristol-Myers Squibb y Forest y ha trabajado como ponente para GlaxoSmithKline. Los restantes autores refieren no tener relaciones económicas con intereses comerciales.*

## DSM-5初步田野調查： 嶄新的風華與昔日的荊棘

[The initial field trials of DSM-5: new blooms and old thorns]

「玫瑰之所以為玫瑰，正因它是玫瑰」(1)。在精神病診斷中，我們依然像Robins和Guze為研究診斷準則所作的來詮釋這句話：信度應為檢測診斷效度所做的第一個測試(2)。為了發展以實證為基礎的精神醫學，DSM-III及DSM-IV採納Robin和Guze的策略——為了可辨識出的徵兆及症狀，建立實驗性證實的準則。初步DSM-5田野調查的信度結果分為三篇論文發表於本期(2013年1月)美國精神醫學會期刊(3-5)。如同以往DSM所有的版本，用以測量信度的方法反映了目前精神醫學調查的標準(3)。這次DSM-5的田野調查是第一次採用以下的研究方法：由兩位經過診斷訓練的不同醫師藉由電腦化檢核表進行獨立的診斷會談，跨不同學術醫學中心診斷一致性的評估，和事前已建立的統計分析計畫。關於此最新的嘗試努力，最後獲得的結果是混雜著正面和令人失望的結果。

大多數臨床醫師也許不熟悉這些論文中所使用的kappa統計方法。舉例來說，如果某個疾病發生於10%的門診病人，且有兩位醫師85%的時候皆同意這項診斷，那麼其kappa統計值為0.46，相當於在此DSM-5田野調查中精神分裂症加權組合性統計值(圖1)。由於全球性診斷差異，精神分裂症在DSM-III中徹底地改變，並且在DSM-IV中再次修改。現在，難以區別精神分裂症、雙極性疾患和分裂情感性疾患之間差異的癥結已經解開，三種疾患都具有良好的kappa統計值。

重鬱症診斷自DSM-IV以來沒變之可疑的信度，明顯地是一個大問題。重鬱症的診斷一直以來都有疑慮，由於它的診斷準則涵蓋了廣泛多種疾病從極度失能的憂鬱病人到很多不尋求治療的一般大眾。雖然可以藉由漢氏憂鬱量表症狀嚴重度評分區分特定對藥物治療有效的病人，但是DSM-IV診斷準則並沒有善用這個區辨性(6)。第二個DSM-IV診斷準則未解決的問題是經常共存的焦慮症，此共病現象顯著地降低抗憂鬱劑的療效(7)。DSM-5工作團隊決定不更改DSM-IV的重鬱症診斷準則，取而代之的是，為了焦慮和憂鬱的混雜症狀，創造其他的診斷。然而，這些努力並沒有改善DSM-IV中憂鬱症的低信度；「焦慮和憂鬱混合疾患」的kappa統計值為0。臨床醫師通常使用病人自填的貝克氏憂鬱量表作為其症狀嚴重程度的指標，田野調查中多面向跨點切割範圍也相似地依賴自我評估量表(5)。對於憂鬱症來說有兩個部分，成人病人自我評估及再評估，和父母評估兒童的級內相關係數(與kappa統計值相似)都超過0.6。未來校訂將傾向於彙整許多可能影響治療的選擇、預後及自殺風險評估的因子：如病人自我評估、認知偏差、合併焦慮、及和維持生命有關之症狀。

經驗豐富的臨床醫師對於所提議的人格疾患之研究診斷方案持著嚴謹保留的態度，且它在臨床診療的可行性有待商榷(8)。在田野調查中多數人格疾患的診斷做得並不好。反社會性人格疾患和強迫性人格疾患都得到有疑問或是不確定的信度水準，自戀和分裂病性人格疾患則被認為太不常見以致於不好評估。然而，邊緣性人格疾患診斷的成功無疑地邁進了一大步。DSM-III將多數人格疾患歸類到第二軸，此舉徹底地切斷精神醫學最珍貴的根基之一。但是，臨床醫師們意識到其病理學特徵雖然看似穩定，卻是相當失能的且對治療的順從度佳。邊緣性人格疾患現在自己有良好的診斷信度成為一個主要診斷。

不穩定性情緒是邊緣性人格疾患在成年期的基本特徵，同時是新增的兒童期疾患—干擾性情緒失調症的重要特徵，這個疾患具有較適度的kappa統計值。類似邊緣性人格疾患在其早期診斷時，干擾性情緒失調症的評估在住院情境下可信度較高。或許對此新增的兒童期診斷有更多臨床經驗時，它的診斷表現也會跟著進

圖一、DSM-5 初次田野調查之診斷的評估者間信度<sup>a</sup>

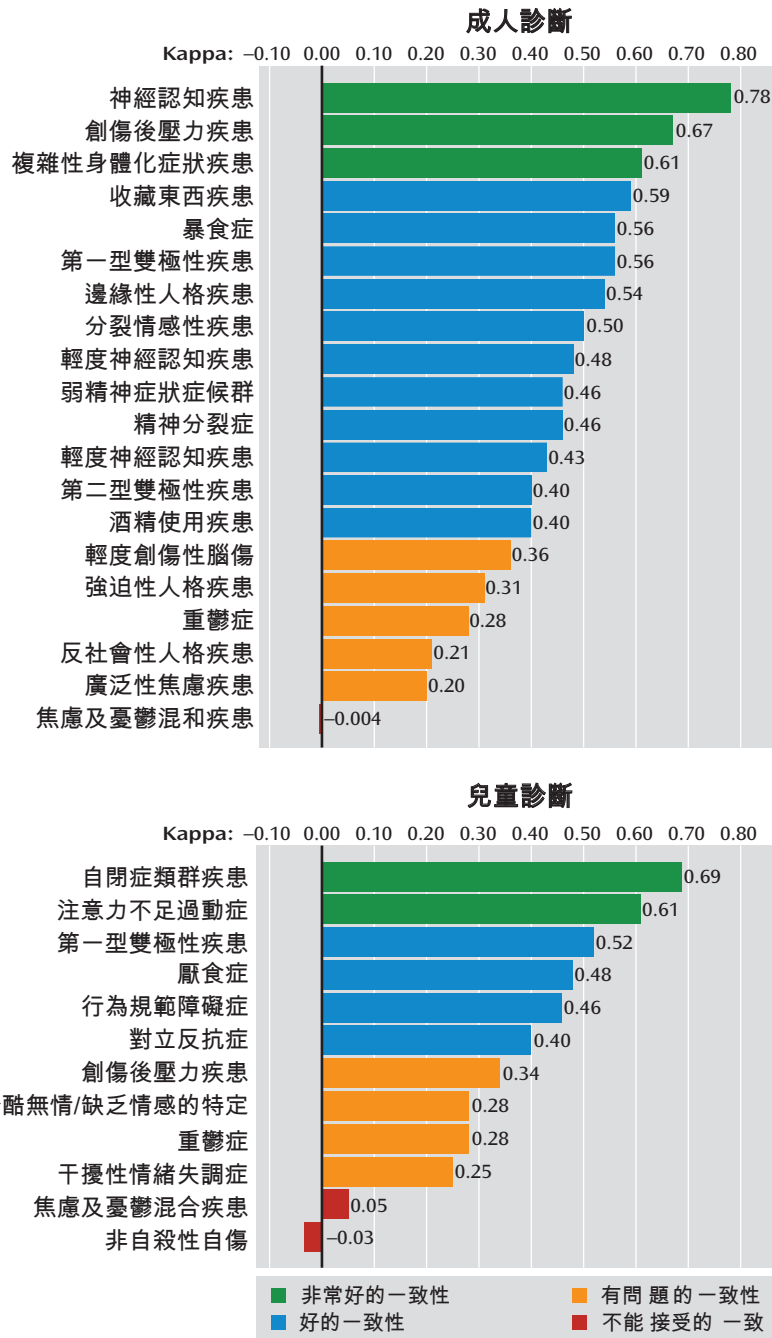

<sup>a</sup> 有些kappa統計值沒有通過標準誤小於0.1的準則，它們列在圖表是為了以實例說明。詳細內容請參閱田野調查報告 (3-5)。

步。以往注意力不足過動症和兒童期雙極性疾患的診斷信度，當出現易怒的症狀時，是個問題，可能受惠於干擾性情緒失調症這個新診斷，目前這兩個疾患都有良好的kappa統計值。重新編組的自閉症類群疾患經歷了先前許多爭論，現在也擁有良好的kappa統計值，雖然此田野調查並沒有包括六歲以下的兒童。

創傷後壓力疾患具有0.67的kappa統計值是另一項歷史性的成就。DSM系列的發起是因為「『精神官能症的標籤』應適用於人們因不容忽視之壓力下，短時間

內引起神經質症狀；在那些平常並沒有精神官能症狀的人(9)。歷經四個版本和六十年後，創傷後壓力疾患現在是具有診斷信度的一個疾患，以前可能隨意地以把正常行為當作疾病治療或解釋來看待這個疾患。除了已經討論過的診斷之外，其他新的或重新定義且具有良好的信度的診斷如重大神經認知疾患、收藏東西疾患、複雜性身體化症狀疾患和暴食症。

田野調查要求必須由一次病人會談及最少的附屬資訊完成診斷。這些診斷信度的資料指出，在一般精神科診療，有2/3的病人能於初診中獲得可靠的DSM-5首要診斷。這些常見、可信的診斷是兒童注意力不足過動症，創傷後壓力疾患、邊緣性人格疾患和酒精使用疾患。其餘1/3有輕微創傷性腦傷和重鬱症的病人可能不會由單一次會談獲得可靠的診斷。當然，這些結合表1和表2及表4的估計值在各個臨床情境下將有所不同（表1：門診成人樣本的加權，將兒童注意力不足過動症加入“其他診斷類別”；表2及表4：成人及兒童的診斷信度[4]）。Robins和Guze引入「未診斷」類別，極力主張當病人初始症狀無法做成確立的診斷時，應重新再評估。此DSM-5田野調查沒有檢驗因由同一位治療的臨床醫師評估此病人隨著時間所顯露出來的疾病而增加的診斷信度。

“玫瑰之所以為玫瑰，正因它是玫瑰”，對Gertrude Stein有更深層的意義——除了去做花的分類外，更因其具有本質上不朽的意涵(10)。瞭解疾患的自然病程，其對於治療的反應，及其對於個體生命的影響是我們致力於做出可信的診斷之理由，但是不管多麼可信，單就一次診斷會談，無法捕捉到在病人身上發生了什麼事的本質。如果醫師、病人和家屬讀了這些田野調查結果而有所學習，或許重要的是：正確的診斷是持續和病人臨床對話必要的一環。

改善精神疾病診斷也將持續地進行，未來的試驗將必須考慮到在實際治療情境臨床的實用性，以及在學術醫學中心以外使用此診斷準則的可信度及可行性。單獨執業的醫師或是精神健康診所可能沒有達到此田野調查中所要求的相關訓練程度的資源。雖然有說雙語的個案，此調查要求病人能以英語說及讀。因此，教育背景較低的病人，或是英語並非是他們最流暢的語言時，其信度可能會不一致。這些田野調查的發現將用以改善未來的版本，也因此最終版的準則可能會再改變，並在DSM-5發表之後需要更進一步試驗。如同前幾版的DSM一樣，DSM-5並沒有全部實現預計要完成的部份，但是DSM-5對於許多先前沒有意識到診斷及治療可帶來益處的病人，記下持續的進展。

*Translated by Susan Shur-Fen Gau, Professor, National Taiwan University Hospital and College of Medicine, Taipei, Taiwan*

#### 參考書目：

1. Goodwin DW: Preface, in *Psychiatric Diagnosis*. By Woodruff RA, Goodwin DW, Guze SB. New York, Oxford University Press, 1974
2. Robins E, Guze SB: Establishment of diagnostic validity in psychiatric illness: its application to schizophrenia. *Am J Psychiatry* 1970; 126:983-987
3. Clarke DE, Narrow WE, Regier DA, Kuramoto SJ, Kupfer DJ, Kuhl EA, Greiner L, Kraemer HC: DSM-5 Field Trials in the United States and Canada, part I: study design, sampling strategy, implementation, and analytic approaches. *Am J Psychiatry* 2013; 170:43-58
4. Regier DA, Narrow WE, Clarke DE, Kraemer HC, Kuramoto SJ, Kuhl EA, Kupfer DJ: DSM-5 Field Trials in the United States and Canada, part II: test-retest reliability of selected categorical diagnoses. *Am J Psychiatry* 2013; 170:59-70
5. Narrow WE, Clarke DE, Kuramoto SJ, Kraemer HC, Kupfer DJ, Greiner L, Regier DA: DSM-5 Field Trials in the United States and Canada, part III: development and reliability testing of a cross-cutting symptom assessment for DSM-5. *Am J Psychiatry* 2013; 170:71-82
6. Fournier JC, DeRubeis RJ, Hollon SD, Dimidjian S, Amsterdam JD, Shelton RC, Fawcett J: Antidepressant drug effects and depression severity: a patient-level meta-analysis. *JAMA* 2010; 303:47-53
7. Fava M, Rush AJ, Alpert JE, Balasubramani GK, Wisniewski SR, Carmin CN, Biggs MM, Zisook S, Leuchter A, Howland R, Warden D, Trivedi MH: Difference in treatment outcome in outpatients with anxious versus nonanxious depression: a STAR\*D report. *Am J Psychiatry* 2008; 165:342-351
8. Shedler J, Beck A, Fonagy P, Gabbard GO, Gunderson J, Kernberg O, Michels R, Westen D: Personality disorders in DSM-5. *Am J Psychiatry* 2010; 167:1026-1028
9. American Psychiatric Association: *Diagnostic and Statistical Manual of Mental Disorders*. Washington, DC, American Psychiatric Association, 1952



10. Stein G: "Sacred Emily," in *Geography and Plays*. Madison, University of Wisconsin Press, 1922 (reissued 1993)

(本文翻譯自 Freedman R, Lewis DA, Michels R, Pine DS, Schultz SK, Tamminga CA, Gabbard GO, Gau SS, Javitt DC, Oquendo MA, Shrout PE, Vieta E, Yager J. The initial field trials of DSM-5: new blooms and old thorns. *Am J Psychiatry*. 2013;170:1-5.)

**ROBERT FREEDMAN, M.D.**  
**DAVID A. LEWIS, M.D.**  
**ROBERT MICHELS, M.D.**  
**DANIEL S. PINE, M.D.**  
**SUSAN K. SCHULTZ, M.D.**  
**CAROL A. TAMMINGA, M.D.**  
**GLEN O. GABBARD, M.D.**  
**SUSAN SHUR-FEN GAU, M.D., PH.D.**  
**DANIEL C. JAVITT, M.D., PH.D.**  
**MARIA A. OQUENDO, M.D., PH.D.**  
**PATRICK E. SHROUT, PH.D.**  
**EDUARD VIETA, M.D., PH.D.**  
**JOEL YAGER, M.D.**

*From the Editors' Office of The American Journal of Psychiatry. Address correspondence to Dr. Freedman (ajp@psych.org). Editorial accepted for publication September 2012 (doi: 10.1176/appi.ajp.2012.12091189; 原文請見<http://ajp.psychiatryonline.org/article.aspx?articleid=1555604>).*

*Authors are Editors or were invited by the Editors to collaborate in this editorial. Several have other roles in the DSM-5 process. Dr. Freedman is co-chair of the Scientific Review Committee, Dr. Pine is chair of the Child Disorders work group, Dr. Schultz is a member of the Geriatric Disorders work group and text editor, and Dr. Yager is co-chair of the Clinical and Public Health Review Committee. Both Dr. Yager and Dr. Freedman also serve as members of the Summit Task Force, which makes final recommendations to the American Psychiatric Association Board of Trustees. Dr. Gabbard is Editor-in-Chief of the 5th edition of *Treatments of Psychiatric Disorders*, to be published by American Psychiatric Publishing as the initial DSM-5 treatment book. Financial disclosures of the Editor and Deputy Editors are published each year in the January issue. Dr. Gau has received speaking honoraria and travel funds from Eli Lilly; she has been an investigator in a clinical trial sponsored by Eli Lilly; and she has received speaker's honoraria from AstraZeneca and Janssen. Dr. Javitt has received research grants from Jazz pharmaceuticals, Pfizer, and Roche; has served as a consultant to AstraZeneca, Bristol-Myers Squibb, Cypress, Lilly, Lundbeck, Merck, NPS, Pfizer, Sanofi, Schering-Plough, Sepracor, Solvay, Takeda, and Sunovion; serves on the advisory board of Promentis Pharmaceuticals; and has equity in Glytech, Inc. Dr. Oquendo has received unrestricted educational grants or lecture fees from AstraZeneca, Bristol-Myers Squibb, Eli Lilly, Janssen, Otsuka, Pfizer, Sanofi-Aventis, and Shire; owns equity in Bristol-Myers Squibb; and receives royalty payments for eC-SSRS from ERT, Inc. Dr. Vieta has served as a consultant and speaker and received research support from AstraZeneca, Bristol-Myers Squibb, and Forest and served as a speaker for GlaxoSmithKline. The remaining authors report no financial relationships with commercial interests.*

*First published in the United States by American Psychiatric Association, Arlington, Virginia. Copyright 2013. All rights reserved. Used with permission. Translation of text into Chinese has not been verified for accuracy by the American Psychiatric Association. No part of this publication may be reproduced or transmitted in any form, by any means, without written permission of the publisher, American Psychiatric Association (www.appi.org).*

*The APA is not responsible for any errors, omissions, or other possible defects in the reproduction.*

## DSM-5初步现场调查: 崭新的风华与昔日的荆棘

[The initial field trials of DSM-5: new blooms and old thorns]

「玫瑰之所以为玫瑰，正因它是玫瑰」(1)。在精神病诊断中，我们依然像Robins和Guze为研究诊断标准采取的方法来诠释这句话：信度应该是检测诊断效度所做的第一个测试(2)。为了发展以循证为基础的精神医学，DSM-III及DSM-IV采纳了Robin和Guze的策略—使用经实践证实的可识别的征兆及症状。初步的DSM-5现场调查的信度结果分为三篇论文发表于本期(2013年1月)美国精神医学杂志(3-5)。如同以往DSM所有的版本，用以测量信度的方法反映了目前精神医学研究的标准(3)。这次DSM-5的现场调查第一次采用了以下的研究方法：由两位经过诊断培训的医师用计算机化检核表进行独立的诊断会谈，评估不同学术中心诊断的一致性和事先建立好的统计分析计划。关于此最新的尝试，最后的结果既有正面的也有负面的。

大多数临床医师也许不熟悉这些论文中所使用的kappa统计值。举例来说，如果某个疾病发生于10%的门诊病人中，有两位医师在85%的时间对这个疾病的诊断是一致的，那么其kappa统计值为0.46；这相当于在DSM-5现场调查中精神分裂症的加权组合性统计值(图1)。由于全球的诊断差异，精神分裂症的诊断标准在DSM-III中被彻底地更改，并且在DSM-IV中被再次修改。现在，难以区分精神分裂症、双向障碍和分裂情感性障碍的问题已经被基本解决，三种疾病的诊断都具有良好的kappa统计值。

抑郁症诊断自DSM-IV以来没有变化，但其可疑的信度明显是一个问题。对于抑郁症的诊断一直以来都存在问题，因为它的诊断标准涵盖了多种疾病：从残疾程度非常高的忧郁病人到很多不寻求治疗的一般大众。虽然可以由汉密尔顿抑郁量表症状严重程度评分来区分特定药物治疗有效的病人，但是DSM-IV诊断标准并没有体现这个特性(6)。第二个DSM-IV诊断标准未解决的问题是经常与抑郁症共存的焦虑症，此共病现象显著地降低了抗抑郁剂的疗效(7)。DSM-5工作团队决定不更改DSM-IV的抑郁症诊断标准，取而代之的是，为焦虑和抑郁并存的情况创造其他的诊断。然而，这些努力并没有改善DSM-IV中抑郁症信度低的问题；「混合性焦虑和抑郁」的kappa值为0。临床医生通常使用病人自评的贝克抑郁量表作为其症状严重程度的指标，现场调查中多维度跨点切割范围也依赖自我评估量表(5)。对于抑郁症来说有两个维度和内部相关性，即成年病人的自我评估和再评估，以及父母对儿童的评估(与kappa值相似)，这些都超过了0.6。未来修订将倾向于整合许多影响治疗方法选择、预后及自杀风险评估的因素：包括病人自我评估、认知偏差、合并焦虑及维持生命有关的症状。

经验丰富的临床医师对于所提议的人格障碍的研究诊断方案持保留态度，并且认为它在临床诊疗的可行性有待商榷(8)。在现场调查中多数人格障碍的诊断效果不好。反社会人格障碍和强迫性人格障碍诊断的信度是可疑或者不确定的；其他类型，如自恋和分裂型人格障碍则被认为太不常见以致于不好评估。然而，边缘型人格障碍诊断无疑向成功迈进了一大步。DSM-III将多数人格障碍归为轴二疾病，此举彻底地切断了精神医学最珍贵的根基之一。但是，临床医生们意识到虽然边缘型人格障碍看似稳定，但其致残度高而治疗效果较好。因此，边缘型人格障碍目前正在成为有良好诊断信度的一个主要诊断。

不稳定性情绪是边缘型人格障碍在成年期的基本特征，同时是新增的儿童期

图一、DSM-5第一次现场调查诊断评估者间的信度<sup>a</sup>

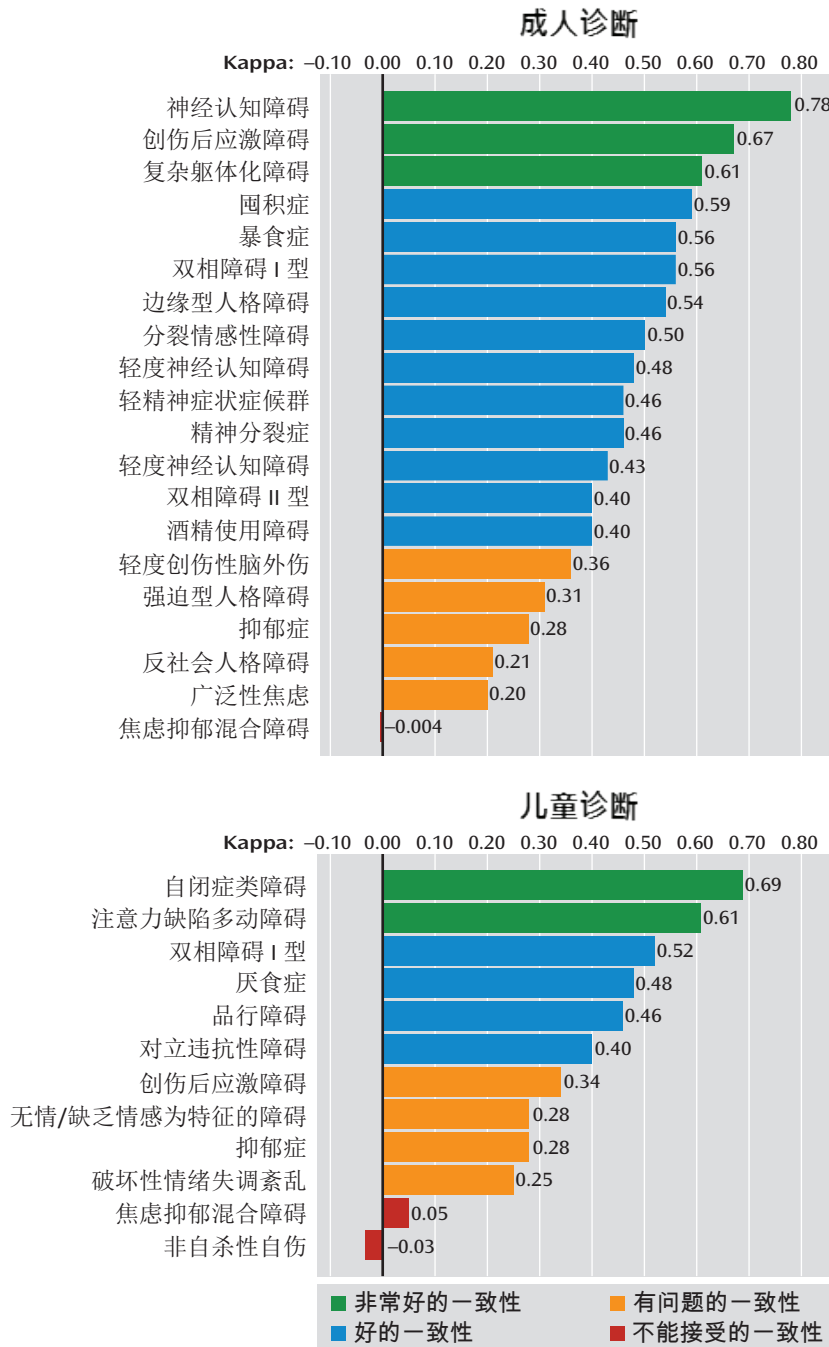

<sup>a</sup> 有些kappa统计值没有达到标准误小于0.1的标准，它们列在图表中是为了以实例说明。详细内容请参阅现场调查报告(3-5)。

障碍-干扰性情绪失调症的重要特征，这一疾患有着中等的kappa值。类似于边缘型人格障碍的早期诊断，干扰性情绪失调症的评估在住院情况下信度较高。或许对这个新增的儿童期障碍的诊断会随着临床经验的丰富而提高。以往注意力缺陷多动障碍和儿童期双相障碍的诊断信度是个问题，尤其是当出现易怒症状的时候；这两类疾病的诊断可能将受惠于破坏性情绪失调紊乱这个新诊断；目前这两个疾病都有良好的kappa统计值。重新编组的自闭症类群疾病经历了先前许多争论，现

在也拥有良好的kappa统计值，虽然此现场调查并没有包括六岁以下的儿童。

创伤后应激障碍的kappa值是0.67，这是另一项历史性的成就。DSM系统的产生是因为『精神官能症的标签』被用于那些平常并没有精神官能质的人，在因巨大压力下短时间内发生的神经质症状的情况(9)。历经六十年四个版本后，创伤后应激障碍现在是具有诊断信度的一个疾病，这个疾病以前可能被看成是把正常行为归于病态。除了已经讨论过的诊断之外，其他新的或重新定义的诊断都具有良好的信度，如严重神经认知疾病、囤积症、复杂性躯体化疾病、和暴食症。

现场调查要求由一次病人会谈以及最少的附属信息完成诊断。这些诊断信度的数据提示，在一般精神科诊疗中，有2/3的病人能于初诊中获得可靠的DSM-5主要诊断。这些常见、可信的诊断是儿童注意力缺陷多动障碍、创伤后应激障碍、边缘型人格障碍和酒精使用障碍。其余1/3有轻微创伤性脑外伤和抑郁症的病人可能不能由一次会谈获得可靠的诊断。当然，这些综合了表1、表2、和表4的估计值在各个临床环境中将有所不同(表1:门诊成人样本的加权，将儿童注意力缺陷多动障碍列为“其他诊断”;表2及表4:成人及儿童的诊断信度[4])。Robins和Guze引入「未诊断」类别，极力主张当病人初始症状无法确定时，应重新再评估。此次DSM-5现场调查没有考虑同一位医生评估一个病人时，随着时间发展而显露出来的更多或更明显的症状而导致诊断信度增加的情况。

“玫瑰之所以为玫瑰，正因它是玫瑰”，对于Gertrude Stein有更深层的意义—除了去做花的分类外，更因其具有本质上不朽的涵意(10)。了解疾病的自然病程，其对于治疗的反应，及其对于个体生命的影响是我们致力于做出可信的诊断的理由。但是不管信度多高，单就一次诊断会谈，无法捕捉到在病人身上发生的事情的本质。如果医生、病人和家属了解了这些现场调查结果而有所领悟，或许最重要的是:正确的诊断是持续和病人临床对话中必要的一环。

改善对精神疾病的诊断仍将持续。未来的研究必须考虑到在临床的实用性，以及在学术医学中心以外使用此诊断标准的可信度及可行性。单独执业的医师或是精神健康诊所可能没有能达到此现场调查中所要求的相关训练程度的资源。虽然有说双语的个案，此次调查要求病人用英语说和读。因此，文化程度较低的病人，或是英语并非他们最流畅的语言时，其信度可能会不同。这些现场调查的结果将用以改进未来的版本，因此最终版的标准也可能会再次改变，并在DSM-5发表之后需要更进一步试验。如同前几版的DSM一样，DSM-5并没有完全实现预计要完成的部份；但是对于许多先前没有意识到诊断及治疗可以给他们带来益处的病人来讲，DSM-V标记着持续的进步。

*Translated by Susan Shur-Fen Gau, Professor, National Taiwan University Hospital and College of Medicine, Taipei, Taiwan*

## 参考文献

1. Goodwin DW: Preface, in Psychiatric Diagnosis. By Woodruff RA, Goodwin DW, Guze SB. New York, Oxford University Press, 1974
2. Robins E, Guze SB: Establishment of diagnostic validity in psychiatric illness: its application to schizophrenia. *Am J Psychiatry* 1970; 126:983-987
3. Clarke DE, Narrow WE, Regier DA, Kuramoto SJ, Kupfer DJ, Kuhl EA, Greiner L, Kraemer HC: DSM-5 Field Trials in the United States and Canada, part I: study design, sampling strategy, implementation, and analytic approaches. *Am J Psychiatry* 2013; 170:43-58
4. Regier DA, Narrow WE, Clarke DE, Kraemer HC, Kuramoto SJ, Kuhl EA, Kupfer DJ: DSM-5 Field Trials in the United States and Canada, part II: test-retest reliability of selected categorical diagnoses. *Am J Psychiatry* 2013; 170:59-70
5. Narrow WE, Clarke DE, Kuramoto SJ, Kraemer HC, Kupfer DJ, Greiner L, Regier DA: DSM-5 Field Trials in the United States and Canada, part III: development and reliability testing of a cross-cutting symptom assessment for DSM-5. *Am J Psychiatry* 2013; 170:71-82
6. Fournier JC, DeRubeis RJ, Hollon SD, Dimidjian S, Amsterdam JD, Shelton RC, Fawcett J: Antidepressant drug effects and depression severity: a patient-level meta-analysis. *JAMA* 2010; 303:47-53

7. Fava M, Rush AJ, Alpert JE, Balasubramani GK, Wisniewski SR, Carmin CN, Biggs MM, Zisook S, Leuchter A, Howland R, Warden D, Trivedi MH: Difference in treatment outcome in outpatients with anxious versus nonanxious depression: a STAR\*D report. *Am J Psychiatry* 2008; 165:342–351
8. Shedler J, Beck A, Fonagy P, Gabbard GO, Gunderson J, Kernberg O, Michels R, Westen D: Personality disorders in DSM-5. *Am J Psychiatry* 2010; 167:1026–1028
9. American Psychiatric Association: *Diagnostic and Statistical Manual of Mental Disorders*. Washington, DC, American Psychiatric Association, 1952
10. Stein G: “Sacred Emily,” in *Geography and Plays*. Madison, University of Wisconsin Press, 1922 (reissued 1993)

(本文翻译自 Freedman R, Lewis DA, Michels R, Pine DS, Schultz SK, Tamminga CA, Gabbard GO, Gau SS, Javitt DC, Oquendo MA, ShROUT PE, Vieta E, Yager J. The initial field trials of DSM-5: new blooms and old thorns. *Am J Psychiatry*. 2013;170:1–5.)

**ROBERT FREEDMAN, M.D.**  
**DAVID A. LEWIS, M.D.**  
**ROBERT MICHELS, M.D.**  
**DANIEL S. PINE, M.D.**  
**SUSAN K. SCHULTZ, M.D.**  
**CAROL A. TAMMINGA, M.D.**  
**GLEN O. GABBARD, M.D.**  
**SUSAN SHUR-FEN GAU, M.D., PH.D.**  
**DANIEL C. JAVITT, M.D., PH.D.**  
**MARIA A. OQUENDO, M.D., PH.D.**  
**PATRICK E. SHROUT, PH.D.**  
**EDUARD VIETA, M.D., PH.D.**  
**JOEL YAGER, M.D.**

*From the Editors’ Office of The American Journal of Psychiatry. Address correspondence to Dr. Freedman (ajp@psych.org). Editorial accepted for publication September 2012 (doi: 10.1176/appi.ajp.2012.12091189; 原文请见<http://ajp.psychiatryonline.org/article.aspx?articleid=1555604>).*

*Authors are Editors or were invited by the Editors to collaborate in this editorial. Several have other roles in the DSM-5 process. Dr. Freedman is co-chair of the Scientific Review Committee, Dr. Pine is chair of the Child Disorders work group, Dr. Schultz is a member of the Geriatric Disorders work group and text editor, and Dr. Yager is co-chair of the Clinical and Public Health Review Committee. Both Dr. Yager and Dr. Freedman also serve as members of the Summit Task Force, which makes final recommendations to the American Psychiatric Association Board of Trustees. Dr. Gabbard is Editor-in-Chief of the 5th edition of *Treatments of Psychiatric Disorders*, to be published by American Psychiatric Publishing as the initial DSM-5 treatment book. Financial disclosures of the Editor and Deputy Editors are published each year in the January issue. Dr. Gau has received speaking honoraria and travel funds from Eli Lilly; she has been an investigator in a clinical trial sponsored by Eli Lilly; and she has received speaker’s honoraria from AstraZeneca and Janssen. Dr. Javitt has received research grants from Jazz pharmaceuticals, Pfizer, and Roche; has served as a consultant to AstraZeneca, Bristol-Myers Squibb, Cypress, Lilly, Lundbeck, Merck, NPS, Pfizer, Sanofi, Schering-Plough, Sepracor, Solvay, Takeda, and Sunovion; serves on the advisory board of Promentis Pharmaceuticals; and has equity in Glytech, Inc. Dr. Oquendo has received unrestricted educational grants or lecture fees from AstraZeneca, Bristol-Myers Squibb, Eli Lilly, Janssen, Otsuko, Pfizer, Sanofi-Aventis, and Shire; owns equity in Bristol-Myers Squibb; and receives royalty payments for eC-SSRS from ERT, Inc. Dr. Vieta has served as a consultant and speaker and received research support from AstraZeneca, Bristol-Myers Squibb, and Forest and served as a speaker for GlaxoSmithKline. The remaining authors report no financial relationships with commercial interests.*

*First published in the United States by American Psychiatric Association, Arlington, Virginia. Copyright 2013. All rights reserved. Used with permission. Translation of text into Chinese has not been verified for accuracy by the American Psychiatric Association. No part of this publication may be reproduced or transmitted in any form, by any means, without written permission of the publisher, American Psychiatric Association ([www.appi.org](http://www.appi.org)).*

*The APA is not responsible for any errors, omissions, or other possible defects in the reproduction.*
